# Supplementary material
Source: Springer Nature journal article supplement (https://www.springermedizin.de/resource/supplementary/12903_2014_465_MOESM2_ESM.pdf/9516752)

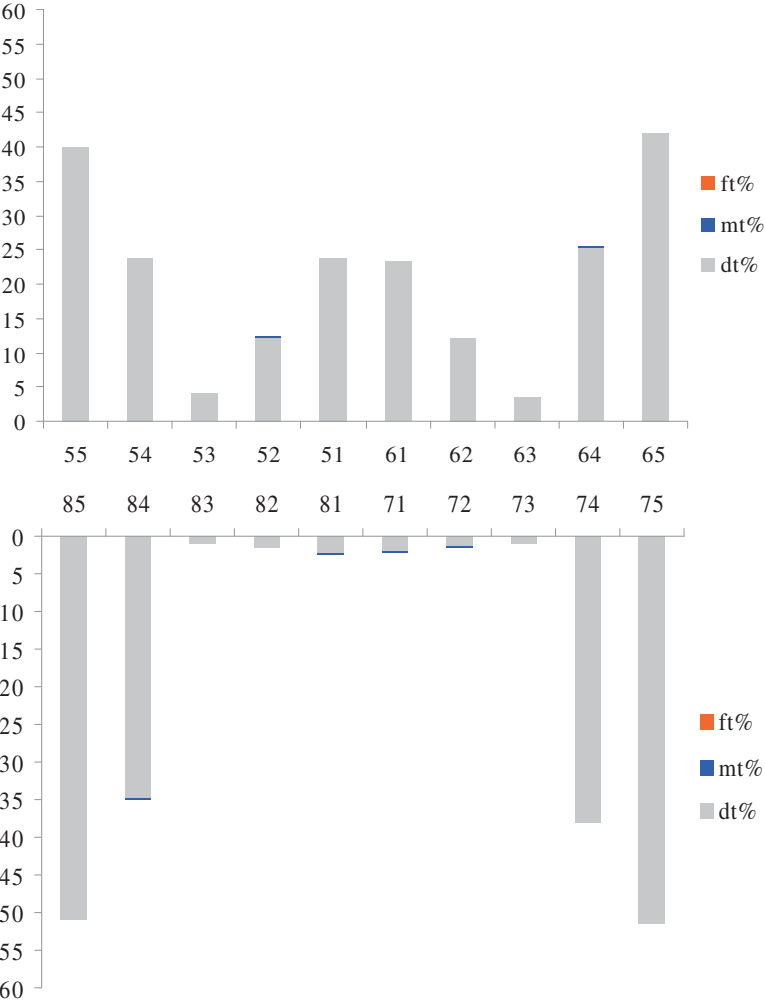

Supplement: MOESM2 [file 9516752]
